# Supplementary material for: Statistical Inference Methods for Two Crossing Survival Curves: A Comparison of Methods
Source: PubMed Central journal article supplement (PMC4304842; doi:10.1371/journal.pone.0116774), 2015-01-23
Supplement: pone.0116774.s001.pdf [file pone.0116774.s001.pdf]

**Table S1. Hypothesis tests for two-sample survival data**

| No. | Name                             | Test statistic                                                                                                                                                                                                                                    | Notations                                                                                                                                                                                                                                                                                                                                                                                                                                                                                                                                                                                                           |
|-----|----------------------------------|---------------------------------------------------------------------------------------------------------------------------------------------------------------------------------------------------------------------------------------------------|---------------------------------------------------------------------------------------------------------------------------------------------------------------------------------------------------------------------------------------------------------------------------------------------------------------------------------------------------------------------------------------------------------------------------------------------------------------------------------------------------------------------------------------------------------------------------------------------------------------------|
| 1   | Weighted Log-rank                | $Z = \frac{[\sum_{j=1}^{\tau} W(t_j)(d_{1j} - n_{1j} \left(\frac{d_j}{n_j}\right))]^2}{\sum_{j=1}^{\tau} W(t_j)^2 \left(\frac{n_{1j}}{n_j}\right) \left(1 - \frac{n_{1j}}{n_j}\right) \left(\frac{n_j - d_j}{n_j - 1}\right) d_j} \sim \chi^2(1)$ | <p><math>W(t_j)=1</math>, Logrank test (LR);</p> <p><math>W(t_j)=n_j</math>, Gehan-Wilcoxon test (GW);</p> <p><math>W(t_j)=\sqrt{n_j}</math>, Tarone-Ware test (TW);</p> <p><math>W(t_j)=[S(t_{j-1})]^\rho [1-S(t_{j-1})]^\gamma</math> with <math>\rho \geq 0, \gamma \geq 0</math>.</p> <p>Fleming-Harrington test (<math>G^{\rho,\gamma}</math>),</p> <p>where <math>d_{ij}</math> is the number of events in the <math>i</math>th group (<math>i=1, 2</math>) out of <math>n_{ij}</math> individuals (at risk) at time <math>t_j</math> and <math>d_j=d_{1j}+d_{2j}</math>, <math>n_j=n_{1j}+n_{2j}</math>.</p> |
| 2   | Renyi(RY)                        | $Q = \sup\{ \tilde{Z}(t_j) , t_j \leq \tau\} / \sigma(\tau)$                                                                                                                                                                                      | $\tilde{Z}(t_j) = \sum_{t_k \leq t_j} W(t_k) \left[ d_{1k} - n_{1k} \left(\frac{d_k}{n_k}\right) \right], j = 1, 2, \dots, \tau,$ $\sigma^2(\tau) = \sum_{t_k \leq \tau} W(t_k)^2 \left(\frac{n_{1k}}{n_k}\right) \left(\frac{n_{2k}}{n_k}\right) \left(\frac{n_k - d_k}{n_k - 1}\right) d_k$                                                                                                                                                                                                                                                                                                                       |
| 3   | Modified Kolmogorov-Smirnov(MKS) | $y = \sup_{0 \leq t \leq T}  Y(t) $                                                                                                                                                                                                               | $Y_{N_1, N_2}(t) = \frac{1}{2} \{ \hat{S}_1(t) + \hat{S}_2(t) \} \int_0^t \left\{ \frac{N_1 \hat{C}_1(s-) N_2 \hat{C}_2(s-)}{N_1 \hat{C}_1(s-) + N_2 \hat{C}_2(s-)} \right\}^{\frac{1}{2}} \times I_{\{N_1(s)N_2(s) > 0\}} d\{\hat{H}_1(s) - \hat{H}_2(s)\}$ $T = \max\{t_j : N_1(t_j)N_2(t_j) > 0\}$                                                                                                                                                                                                                                                                                                               |
| 4   | Cramer-von Mises(CVM)            | $\int_0^\tau \left[ \int_0^t K(s) d\{\hat{A}(s) - \hat{A}_0^*(s)\} \right]^2 dH(s)$                                                                                                                                                               | <p>CVM1 statistic uses untransformed process, which is asymptotic to a standard Brownian motion process, another CVM2 statistic converges to a Brownian bridge process</p>                                                                                                                                                                                                                                                                                                                                                                                                                                          |

|   |                                     |                                                                                                                                                                                                                                                                                                                                                                                          |                                                                                                                                                                                                                                                                                                                   |
|---|-------------------------------------|------------------------------------------------------------------------------------------------------------------------------------------------------------------------------------------------------------------------------------------------------------------------------------------------------------------------------------------------------------------------------------------|-------------------------------------------------------------------------------------------------------------------------------------------------------------------------------------------------------------------------------------------------------------------------------------------------------------------|
| 5 | Weighted Kaplan-Meier (WKM)         | $V_{wkm} = \sqrt{\frac{N_1 N_2}{N_1 + N_2}} \int_0^{T_m} \tilde{w}(t) [\widehat{S}_2(t) - \widehat{S}_1(t)] dt$ $\widehat{\sigma}_{wkm}^2 = -\int_0^{T_m} \left\{ \int_t^{T_m} [\tilde{w}(s) \widehat{S}(s)] ds \right\}^2 \frac{N_1 \widehat{C}_1(t-) + N_2 \widehat{C}_2(t-)}{(N_1 + N_2) \widehat{C}_1(t-) \widehat{C}_2(t-)} \frac{d\widehat{S}(t)}{\widehat{S}(t) \widehat{S}(t-)}$ | $T_m = \sup\{t : \min\{\widehat{C}_1(t), \widehat{C}_2(t), \widehat{S}_1(t), \widehat{S}_2(t)\} > 0\}$ $\tilde{w}(t) = \frac{(N_1 + N_2) \widehat{C}_1(t-) \widehat{C}_2(t-)}{N_1 \widehat{C}_1(t-) + N_2 \widehat{C}_2(t-)}$                                                                                     |
| 6 | Maximum Weighted Kaplan-Meier (MKM) | $\tilde{V} = \max  \tilde{V}_\ell $                                                                                                                                                                                                                                                                                                                                                      | $V_\ell = \sqrt{\frac{N_1 N_2}{N_1 + N_2}} \int_0^\tau f\{\widehat{S}(t-)\} \tilde{w}(t) [\widehat{S}_1(t) - \widehat{S}_2(t)] dt$ $f\{S(t-)\} = [S(t-)]^\rho [1 - S(t-)]^\gamma, \rho = 0, 1, 2; \gamma = 0, 1, 2$ $\tilde{V}_\ell = V_\ell / (\widehat{\sigma}_{\ell, \ell})^{1/2}, \ell = 1, \dots, m (m = 9)$ |
| 7 | Lee's versatile test(SHL)           | $SHL1:  Z_1 + Z_2  / 2$ $SHL2: ( Z_1  +  Z_2 ) / 2$ $SHL3: \max( Z_1 ,  Z_2 )$                                                                                                                                                                                                                                                                                                           | $Z_1 \text{ and } Z_2 \text{ are calculated as } Z_1 \text{ with weight function } \rho=0, \gamma=1; Z_2 \text{ with weight function } \rho=1, \gamma=0;$                                                                                                                                                         |
| 8 | Lin and Wang's test(LW)             | $T^* = \frac{\Delta - E(\Delta)}{\sqrt{Var(\Delta)}} \sim N(0, 1)$                                                                                                                                                                                                                                                                                                                       | $\Delta = \sum_{j=1}^{\tau} [d_{1j} - E(d_{1j})]^2$ $E(\Delta) = \sum_{j=1}^{\tau} \frac{n_{1j} n_{2j} d_j (n_j - d_j)}{n_j^2 (n_j - 1)}$ $Var(\Delta) = \sum_{j=1}^{\tau} \{E(d_{1j}^4) - 4E(d_{1j}^3)E(d_{1j}) + 6E(d_{1j}^2)(E(d_{1j}))^2 - 3(E(d_{1j}))^4 - (Var(d_{1j}))^2\}$                                |

|    |                                              |                                                                                                                                                |                                                                                                                                                                                                                                                                                                                                                                                                                                                                                                                                                                                                                                                                                                  |
|----|----------------------------------------------|------------------------------------------------------------------------------------------------------------------------------------------------|--------------------------------------------------------------------------------------------------------------------------------------------------------------------------------------------------------------------------------------------------------------------------------------------------------------------------------------------------------------------------------------------------------------------------------------------------------------------------------------------------------------------------------------------------------------------------------------------------------------------------------------------------------------------------------------------------|
| 9  | Lin and<br>Xu's test<br>(LX)                 | $\Delta^* = \frac{\Delta - \widehat{E}(\Delta)}{\sqrt{\widehat{Var}(\Delta)}} \sim N(0,1)$                                                     | $\Delta = \sum_{t_j < \tau}  \widehat{S}_1(t_j) - \widehat{S}_2(t_j)  (t_{j+1} - t_j)$ $\widehat{E}(\Delta) = \sum_{j t_j < \tau} \left\{ \frac{2}{\pi} [\widehat{\sigma}_{S_1}^2(t_j) + \widehat{\sigma}_{S_2}^2(t_j)] \right\}^{1/2} (t_{j+1} - t_j)$ $\widehat{Var}(\Delta) = \sum_{j t_j < \tau} (t_{j+1} - t_j)^2 \left(1 - \frac{2}{\pi}\right) [\widehat{\sigma}_{S_1}^2(t_j) + \widehat{\sigma}_{S_2}^2(t_j)] + \sum_{j < j'   t_j, t_{j'} < \tau} 2\rho_{j,j'} (t_{j+1} - t_j)(t_{j'+1} - t_{j'}) \left(1 - \frac{2}{\pi}\right) \times \{[\widehat{\sigma}_{S_1}^2(t_j) + \widehat{\sigma}_{S_2}^2(t_j)][\widehat{\sigma}_{S_1}^2(t_{j'}) + \widehat{\sigma}_{S_2}^2(t_{j'})]\}^{1/2}$ |
| 10 | Two-stage(TS)                                | $V = \sup_{\tau_\varepsilon \leq m \leq \tau - \tau_\varepsilon} (V_m)$                                                                        | $V_m = \sum_{j=1}^{\tau} w_j^{(m)} \left( d_{1j} - n_{1j} \frac{d_j}{n_j} \right) / \sqrt{\sum_{j=1}^{\tau} (w_j^{(m)})^2 \left( \frac{n_{1j}}{n_j} \right) \left( \frac{n_{2j}}{n_j} \right) \left( \frac{n_j - d_j}{n_j - 1} \right) d_j}$ $w_j^{(m)} = \begin{cases} -1, & j = 1, 2, \dots, m \\ c_m, & j = m+1, \dots, \tau \end{cases}$                                                                                                                                                                                                                                                                                                                                                     |
| 11 | Adaptive<br>Neyman's<br>Smooth tests<br>(NY) | $T_d = U(\tau)^T \widehat{\sigma}(\tau)^{-1} U(\tau)$ $T_s = \max \{ V_C(\tau)^T \sigma_{CC}(\tau)^{-1} V_C(\tau) : C \in \zeta,  C  = d^* \}$ | $T_d$ : fixed-dimensional test(NY1)<br>$T_s$ : data-driven test(NY2)<br>$V_C(\tau)$ and $\widehat{\sigma}_{CC}(\tau)$ are the subvector and submatrix of $V(\tau)$ and $\sigma(\tau)$ corresponding to the subset $C$ . Schwarz's criterion is given as<br>$S = \arg \max_{C \in \zeta} \{ T_C -  C  \log n \}.$                                                                                                                                                                                                                                                                                                                                                                                 |
